# Supplementary material for: A chiral photoswitch based on enantiospecific interconversion between binaphthyl and helicenoid skeletons
Source: Royal Society of Chemistry journal article supplement (doi:10.1039/d4cc00364k), 2024-01-01
Supplement: d4cc00364k1.pdf [file d4cc00364k1.pdf]

## Electronic Supplementary Information

### Chiral photoswitch based on enantiospecific interconversion between binaphthyl and helicene skeletons

Tetsuya Nakagawa,<sup>a</sup> Ryuji Kato,<sup>a</sup> Yuichi Iiyoshi,<sup>a</sup> Masaki Furuya,<sup>a</sup> Tomoki Kitano,<sup>a</sup> Ryo Nakamura,<sup>a</sup>  
Yasushi Yokoyama<sup>a</sup> and Takashi Ubukata\*<sup>a,b</sup>

<sup>a</sup> Department of Chemistry and Life Science, Graduate School of Engineering Science,  
Yokohama National University, 79-5, Tokiwadai, Hodogaya, Yokohama, Kanagawa 240-8501, Japan  
<sup>b</sup> Typhoon Science and Technology Research Center (TRC), Institute for Multidisciplinary Sciences (IMS),  
Yokohama National University, 79-5, Tokiwadai, Hodogaya, Yokohama, Kanagawa 240-8501, Japan.  
E-mail address: ubukata-takashi-wy@ynu.ac.jp

#### Contents

|                                                           |      |
|-----------------------------------------------------------|------|
| 1 Experimental details                                    | S-2  |
| 2 Synthetic procedures                                    | S-3  |
| 2-1 Synthesis of <b>3</b>                                 | S-3  |
| 2-2 Synthesis of <b>1o</b>                                | S-4  |
| 3 Experimental data                                       | S-5  |
| 3-1 <sup>1</sup> H NMR spectra                            | S-5  |
| 3-2 <sup>13</sup> C NMR spectra                           | S-6  |
| 3-3 LRMS                                                  | S-7  |
| 3-4 HRMS                                                  | S-8  |
| 3-5 HPLC diagrams of <b>1</b>                             | S-9  |
| 3-6 Calculation of the quantum yields                     | S-9  |
| 3-7 Calculation of the thermal cycloreversion parameters  | S-10 |
| 3-8 Chiral HPLC diagrams of <b>1</b>                      | S-10 |
| 3-9 Estimation of thermal racemization                    | S-11 |
| 3-10 Chiral photoswitch reactions of the other enantiomer | S-11 |
| 4 Calculated data                                         | S-12 |
| 4-1 Calculated most stable conformation                   | S-12 |
| 4-2 Calculated total energy                               | S-12 |
| 4-3 Calculated CD spectra                                 | S-12 |
| 4-4 Schematic illustration of cycloreversion              | S-13 |
| 4-5 Energy diagram of <b>1</b>                            | S-13 |
| 4-6 Transition state                                      | S-14 |
| 4-7 Cartesian coordinates for optimized geometries        | S-15 |
| 5 References                                              | S-23 |

## 1 Experimental details

### General

All of the synthetic reactions were carried out under a dry nitrogen atmosphere. Reagents and solvents were purchased and used as received. Flash column chromatography was carried out with Merck 230-400 mesh silica gel using chloroform and hexane as the eluent. Analytical thin-layer chromatography was performed on the Merck pre-coated 0.25-mm thick silica gel TLC plates.  $^1\text{H}$  NMR Spectra were recorded in chloroform- $d$  ( $\text{CDCl}_3$ ) or in methanol- $d_4$  ( $\text{CD}_3\text{OD}$ ) containing tetramethylsilane (TMS) as the internal standard on a 300 MHz NMR spectrometer (DRX300, Bruker).  $^{13}\text{C}\{^1\text{H}, ^{19}\text{F}\}$  NMR Spectra were recorded in chloroform- $d$  ( $\text{CDCl}_3$ ) containing TMS as the internal standard on a 400 MHz NMR spectrometer (ECZ400, JEOL). The  $J$  values are expressed in Hz and quoted chemical shifts are in ppm. Splitting patterns are indicated as s, singlet; d, doublet; t, triplet; m, multiplet. Low-resolution mass spectra were measured by the electron impact ionization using a JEOL JMS-AX-600 mass spectrometer. High resolution mass spectra were measured by a Thermo-Fischer Scientific mass spectrometer, equipped with an ion-trap mass analyzer, with the atomic pressure chemical ionization method. Melting points (Mp) were measured using a Yazawa BY-2 hot stage microscope, and those were uncorrected.

### Optical Measurements

Absorption spectra of **1o** in hexane ( $9.4 \times 10^{-5}$  mol  $\text{dm}^{-3}$ ) were measured on a UV-visible spectrophotometer (V-550, JASCO). Photochemical reaction was carried out in a quartz cell with 10-mm optical path length. Photoirradiation with 280-nm light was carried out using a 100 W xenon lamp (LAX-C100, Asahi spectra), separated by a LAX-UVB 240-300 mirror module and a HQBP 280-UV filter. Photoirradiation with 436-nm light was carried out using a 500 W super high-pressure mercury lamp (USH-500D, USHIO), separated by filters (a 5-cm water filter, a Y-43 glass filter, a V-44 glass filter). An ultra-high performance liquid chromatograph (JASCO, X-LC 3000) equipped with a UV/Vis detector (JASCO X-LC 3070 UV) as well as a silica gel column (ZORBAX Rx-Sil RRHT, Agilent) or a chiral column (OZ-H, Daicel) was used to determine the concentration of isomers during photoirradiation. Photocyclization quantum yield upon irradiation with 280-nm light and photocycloreversion quantum yield upon irradiation with 436-nm light were determined with the procedures described elsewhere.<sup>1</sup> Light intensity was measured using a power meter (Newport, 1830-C) equipped with a detector (818-UV) or a power meter (Newport, 843-R).

### Theoretical calculations

The optimization of structures and frequency calculations of (*P*)- and (*M*)-**1o**, (*P*)-(3a*S*,3b*R*)-**1c** and (*M*)-(3a*S*,3b*R*)-**1c**, the transition state determination between (*P*)-(3a*S*,3b*R*)-**1c** and (*M*)-(3a*S*,3b*R*)-**1c** and the intrinsic reaction coordinate calculation were carried out using DFT with the  $\omega\text{B97X-D}$  functional<sup>2</sup> and 6-31G(d) basis set<sup>3</sup> on Spartan'20 (for optimization of structures) or Spartan'18 (for transition state determination) quantum chemistry software.<sup>4</sup>

CD spectra of (*P*)-**1o**, (*M*)-**1o**, (*P*)-(3a*S*,3b*R*)-**1c**, (*M*)-(3a*R*,3b*S*)-**1c**, (*P*)-(3a*R*,3b*S*)-**1c**, and (*M*)-(3a*S*,3b*R*)-**1c** were calculated for their optimized structures obtained above, using TD-DFT with the  $\omega\text{B97X-D}$  functional and 6-31+G(d)<sup>5</sup> basis set on Gaussian 16 quantum chemistry software.<sup>6</sup>

All calculations were done for the molecules in vacuum.

## 2 Synthetic procedures

Synthesis of **1o** was carried out according to the following procedures.

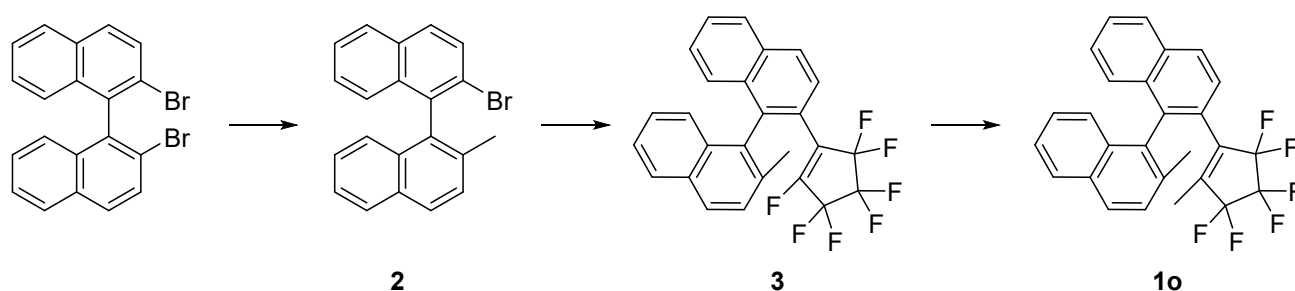

### 2-1 Synthesis of 2-methyl-2'-(perfluorocyclopent-1-en-1-yl)-1,1'-binaphthalene (**3**)

To a solution of 2-bromo-2'-methyl-1,1'-binaphthalene (**2**)<sup>7</sup> (0.0510 g, 0.147 mmol) in dry THF (15 mL) was added dropwise an *n*-BuLi solution in hexane (2.65 mol dm<sup>-3</sup>, 0.0500 mL, 0.133 mmol) at -78 °C under a N<sub>2</sub> atmosphere, and the resulting mixture was stirred for 30 min. To the reaction mixture was added dropwise an octafluorocyclopentene (0.038 mL, 0.28 mmol), and the reaction mixture was stirred for overnight at room temperature. The reaction was quenched by adding water, and the reaction mixture was extracted with ethyl acetate. The combined organic layer was washed with brine and dried over anhydrous Na<sub>2</sub>SO<sub>4</sub>, the drying agent filtered off, and the solvent evaporated. The residue was purified by column chromatography on silica gel using hexane as the eluent, to give 0.0441 g of 2-methyl-2'-(perfluorocyclopent-1-en-1-yl)-1,1'-binaphthalene (**3**) as a white solid in 65% yield.

<sup>1</sup>H NMR (300 MHz, CDCl<sub>3</sub>, TMS) δ/ppm: 2.06 (3H, s), 7.00 (1H, d, *J* = 8.7 Hz), 7.18-7.23 (1H, m), 7.27-7.42 (3H, m), 7.45 (1H, d, *J* = 8.7 Hz), 7.56-7.67 (2H, m), 7.87 (2H, t, *J* = 8.1 Hz), 8.00 (1H, d, *J* = 8.3 Hz), 8.07 (1H, d, *J* = 8.7 Hz). (Fig. S1)

<sup>13</sup>C {<sup>1</sup>H, <sup>19</sup>F} NMR (100 MHz, CDCl<sub>3</sub>, TMS) δ/ppm: 20.15, 109.88, 115.48, 121.59, 122.73, 125.03, 125.08, 125.51, 126.05, 127.01, 127.41, 127.74, 127.85, 128.25, 128.33, 128.60 (2C), 131.84, 131.88, 132.68 (2C), 134.23, 135.26, 139.93, 152.34. There must be an overlapping of two signals in the aromatic region. (Fig. S3)

LRMS (EI, 70eV) *m/z* 460 (100, M<sup>+</sup>). (Fig. S5)

HRMS (APCI-MS with ion trap) Found: *m/z* 460.1055. Calcd for C<sub>26</sub>H<sub>15</sub>F<sub>7</sub>: M<sup>+</sup>, *m/z* 460.1062. (Fig. S7)

Mp = 128.9-130.0 °C.

## 2-2 Synthesis of 2-(3,3,4,4,5,5-hexafluoro-2-methylcyclopent-1-en-1-yl)-2'-methyl-1,1'-binaphthalene (**10**)

To a solution of **3** (0.0991 g, 0.215 mmol) in dry diethyl ether (5 mL) was added dropwise a MeLi solution in diethyl ether (1.66 mol dm<sup>-3</sup>, 0.160 mL, 0.266 mmol) under a N<sub>2</sub> atmosphere at room temperature and the resulting mixture was stirred for overnight. The reaction was quenched by adding water, and the reaction mixture was extracted with ethyl acetate. The combined organic layer was washed with brine and dried over anhydrous Na<sub>2</sub>SO<sub>4</sub>, the drying agent filtered off, and the solvent evaporated. The residue was purified by column chromatography on silica gel using 1% chloroform/hexane as the eluent, to give 0.0634 g of 2-(3,3,4,4,5,5-hexafluoro-2-methylcyclopent-1-en-1-yl)-2'-methyl-1,1'-binaphthalene (**10**) as a white solid in 65% yield.

<sup>1</sup>H NMR (300 MHz, CD<sub>3</sub>OD, TMS) δ/ppm: 1.62 (3H, br s), 2.03 (s, 3H), 6.96 (1H, d, *J* = 8.1 Hz), 7.19 (2H, t, *J* = 7.2 Hz), 7.34-7.40 (2H, m), 7.46 (1H, d, *J* = 7.8 Hz), 7.47 (1H, d, *J* = 8.1 Hz), 7.59 (1H, t, *J* = 7.7 Hz), 7.89 (2H, t, *J* = 6.0 Hz), 8.06 (1H, d, *J* = 8.1 Hz), 8.14 (1H, d, *J* = 9.0 Hz). (Fig. S2)

<sup>13</sup>C {<sup>1</sup>H, <sup>19</sup>F} NMR (100 MHz, CDCl<sub>3</sub>, TMS) δ/ppm: 10.03, 20.42, 110.75, 115.66, 116.28, 124.85, 125.74, 125.91, 126.88, 126.93, 127.20, 127.35, 127.93, 128.11, 128.15, 128.16, 128.24, 128.40, 128.49, 131.84, 132.35, 132.87, 133.82, 138.50, 140.77, 141.24. (Fig. S4)

LRMS (EI, 70eV) *m/z* 456 (100, M<sup>+</sup>). (Fig. S6)

HRMS (APCI-MS with ion trap) Found: *m/z* 456.1301. Calcd for C<sub>27</sub>H<sub>18</sub>F<sub>6</sub>: M<sup>+</sup>, *m/z* 456.1313. (Fig. S8)

Mp = 138.9-140.2 °C.

### 3 Experimental data

#### 3-1 $^1\text{H}$ NMR spectra

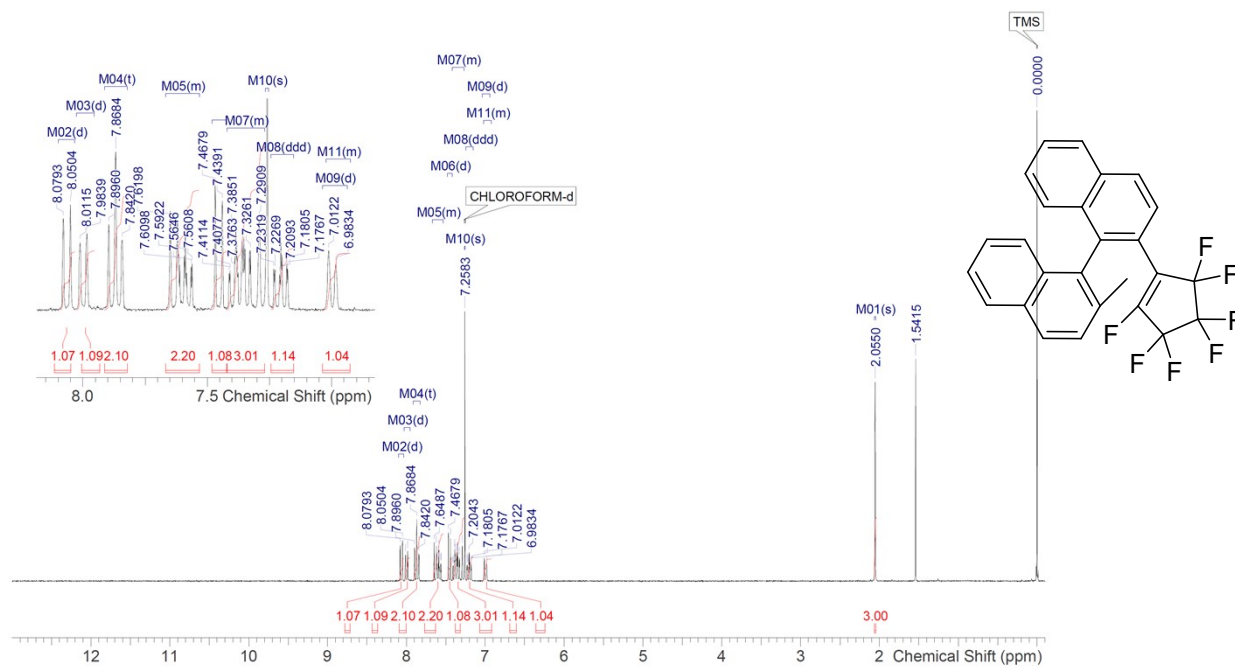

**Fig. S1**  $^1\text{H}$  NMR spectrum of **3** (300 MHz,  $\text{CDCl}_3$ , TMS).

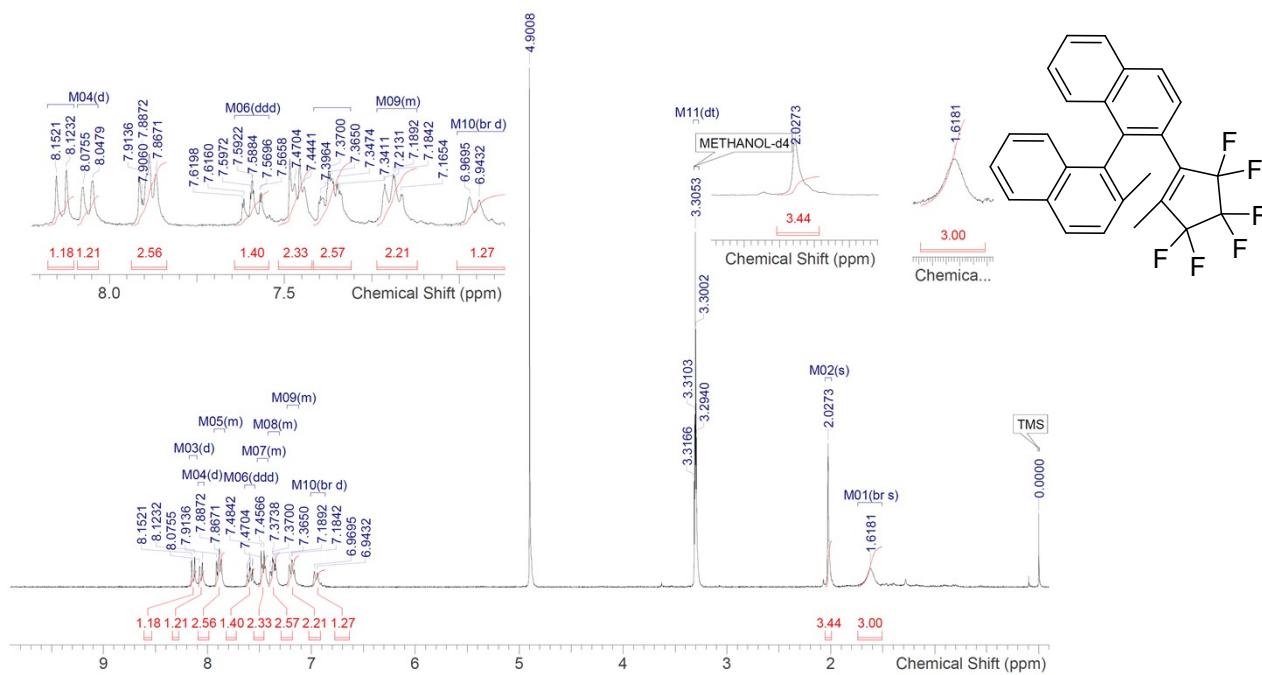

**Fig. S2**  $^1\text{H}$  NMR spectrum of **1o** (300 MHz,  $\text{CD}_3\text{OD}$ , TMS).



3-3 LRMS

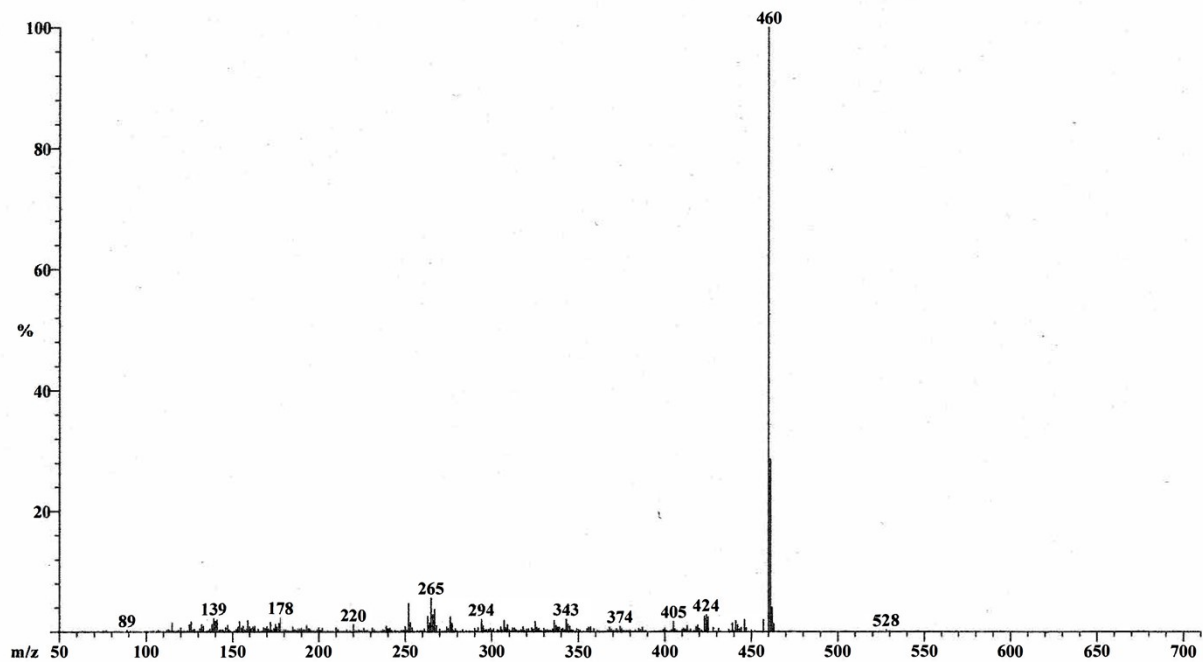

Fig. S5 EI-Mass spectrum of 3.

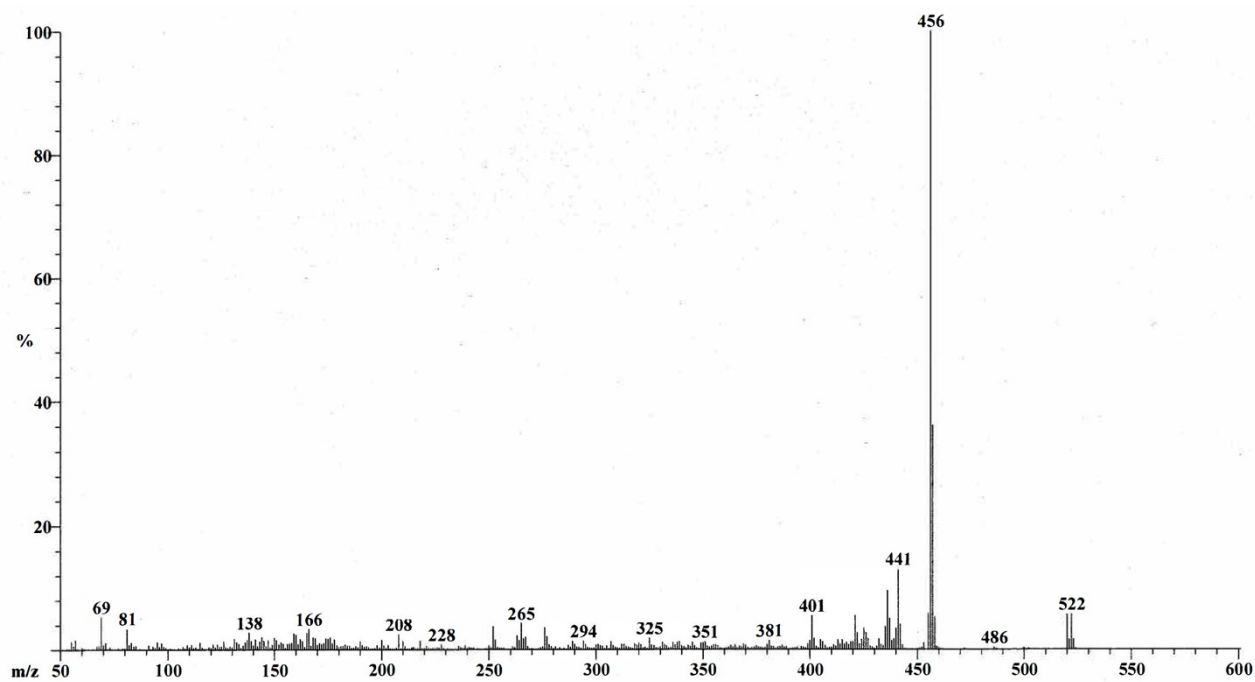

Fig. S6 EI-Mass spectrum of 1o.

### 3-4 HRMS

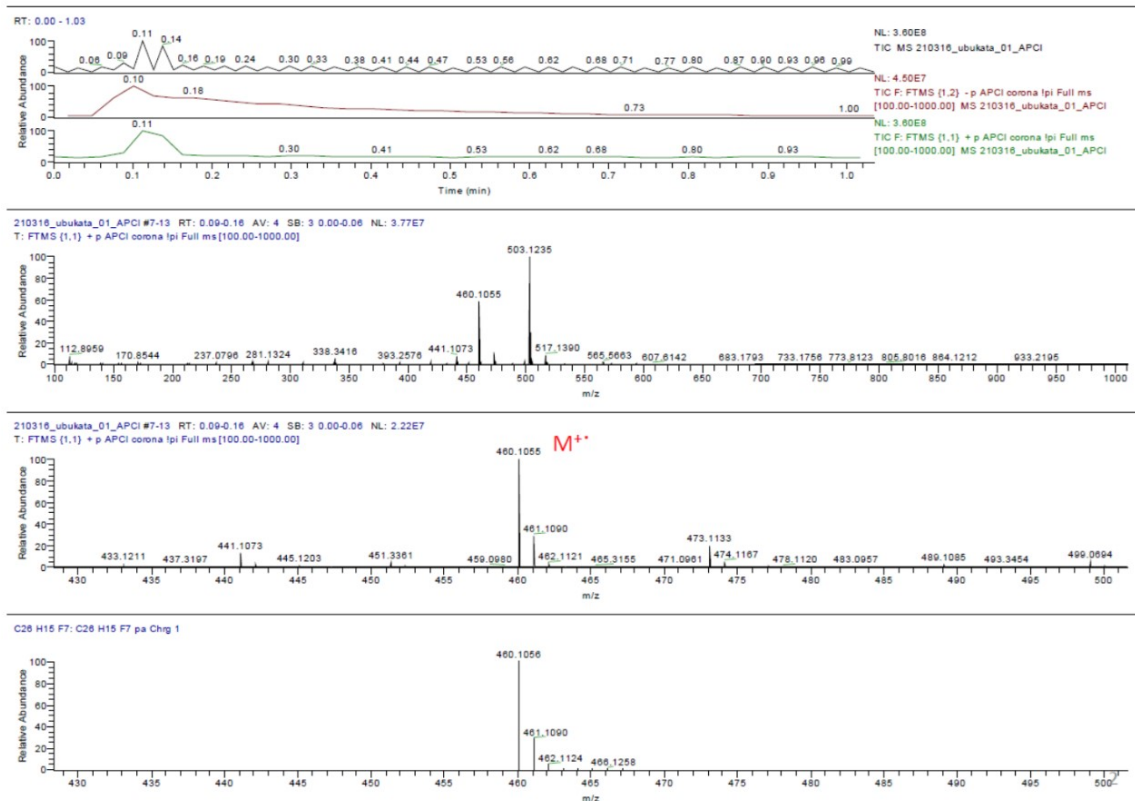

Fig. S7 APCI-Mass spectrum of **3**.

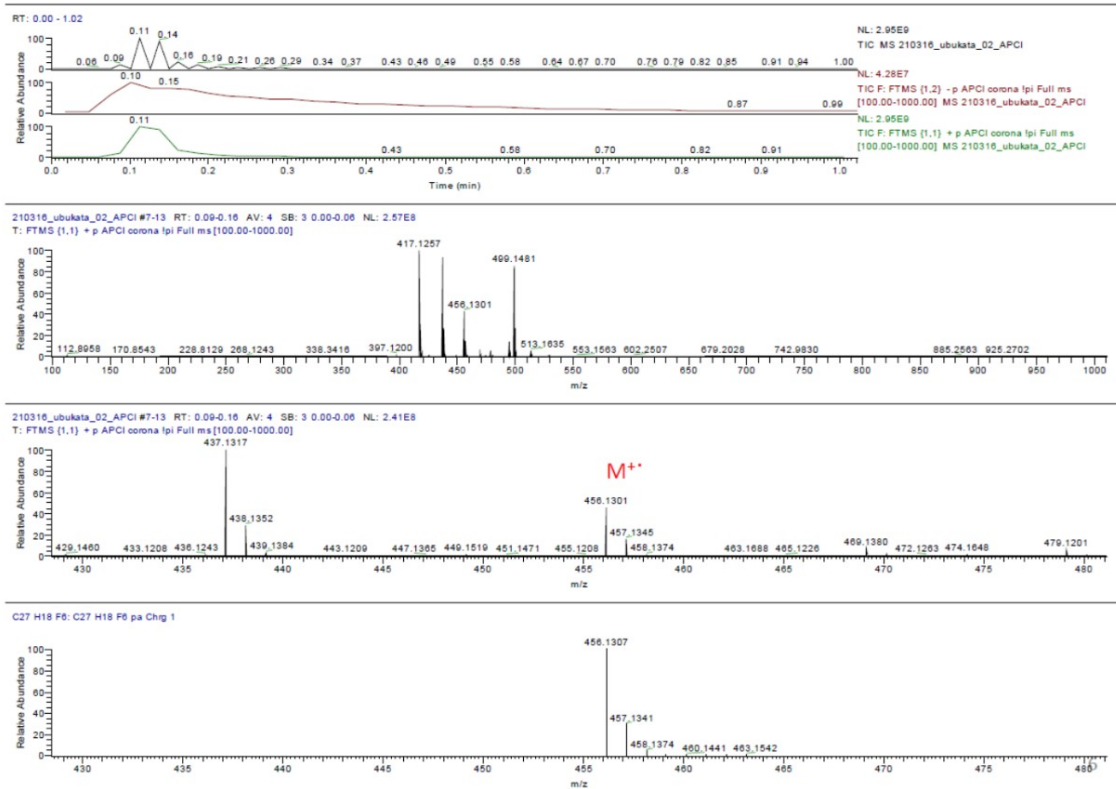

Fig. S8 APCI-Mass spectrum of **1o**.



### 3-5 HPLC diagrams of **1**

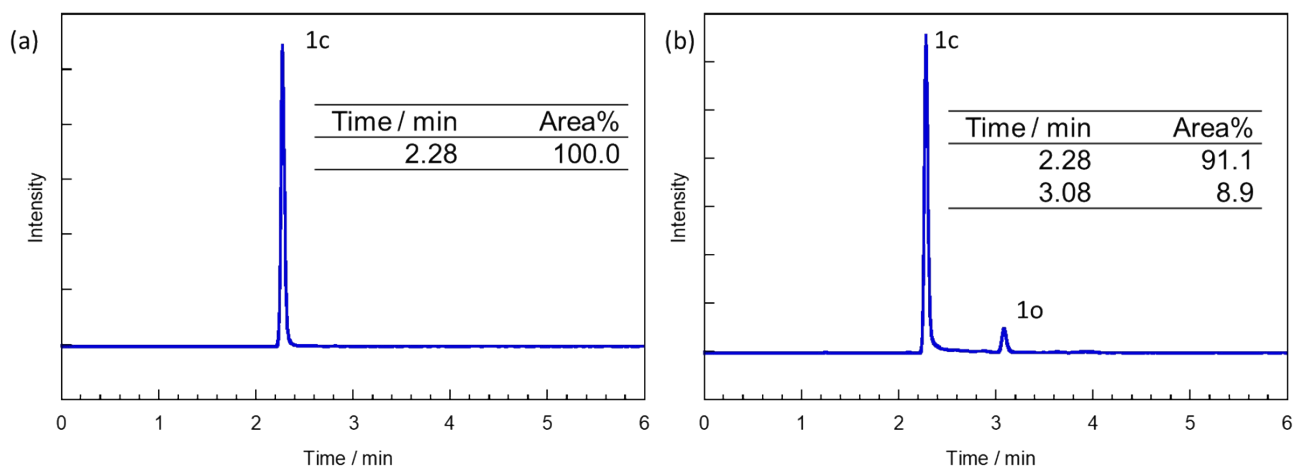

**Fig. S9** HPLC diagrams of racemic **1** obtained after 280-nm ( $0.70 \text{ mW cm}^{-2}$ ) irradiation for 64 min in hexane (a) detected at 461 nm and (b) detected at 299 nm. Column: Agilent ZORBAX Rx-Sil RRHT 2.1 mm id x 100 mm length, Eluent: 0.2% AcOEt / Hex, Current:  $0.25 \text{ mL min}^{-1}$ .

### 3-6 Calculation of the quantum yields

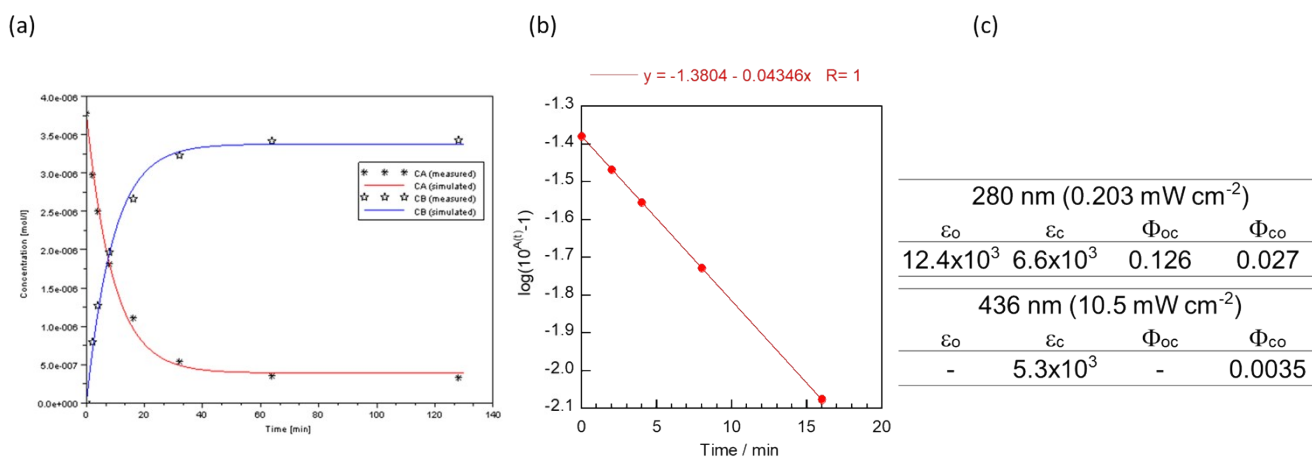

**Fig. S10** (a) Concentration changes of **1o**, **1c** and results of fitting simulation upon irradiation with 280-nm light. (b) Change in absorbance of **1c** at 436 nm upon irradiation with 436-nm light. (c) Molar absorption coefficients and quantum yields at excitation wavelengths.

### 3-7 Calculation of the thermal cycloreversion parameters

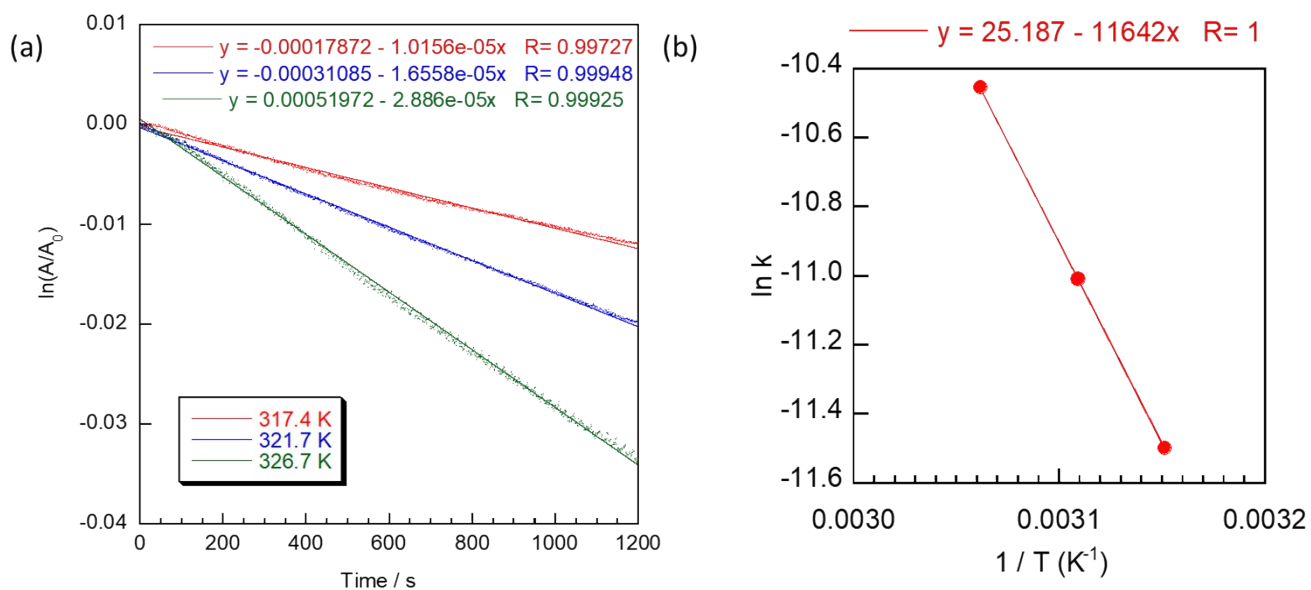

**Fig. S11** (a) Decay of peak absorbance observed at 461 nm upon thermal cycloreversion of **1c** at various temperatures in hexane. (b) Arrhenius plot.

### 3-8 Chiral HPLC diagrams of **1**

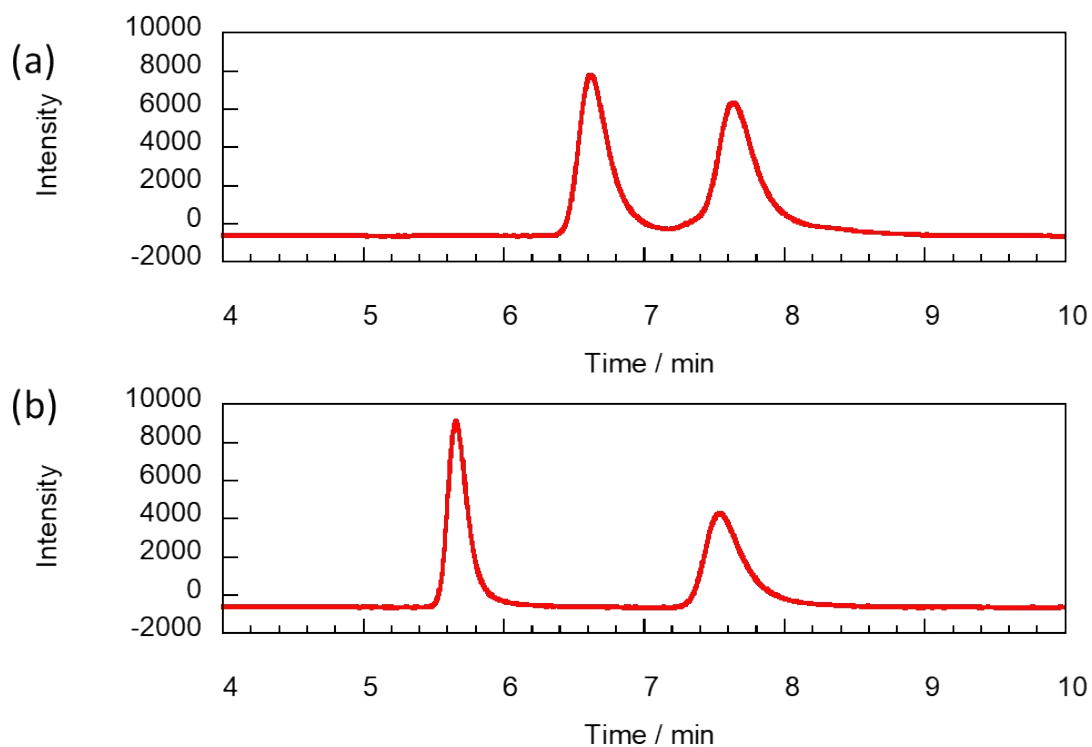

**Fig. S12** Chiral HPLC diagrams of racemic **1** in hexane. (a) **1o** detected at 299 nm, (b) **1c** obtained after 280-nm light ( $0.25 \text{ mW cm}^{-2}$ ) irradiation for 128 min detected at 461 nm. Column: Daicel CHIRALCEL OZ-H 4.6 mm id x 250 mm length, Eluent: Hex, Current:  $1.0 \text{ mL min}^{-1}$ .

### 3-9 Estimation of thermal racemization

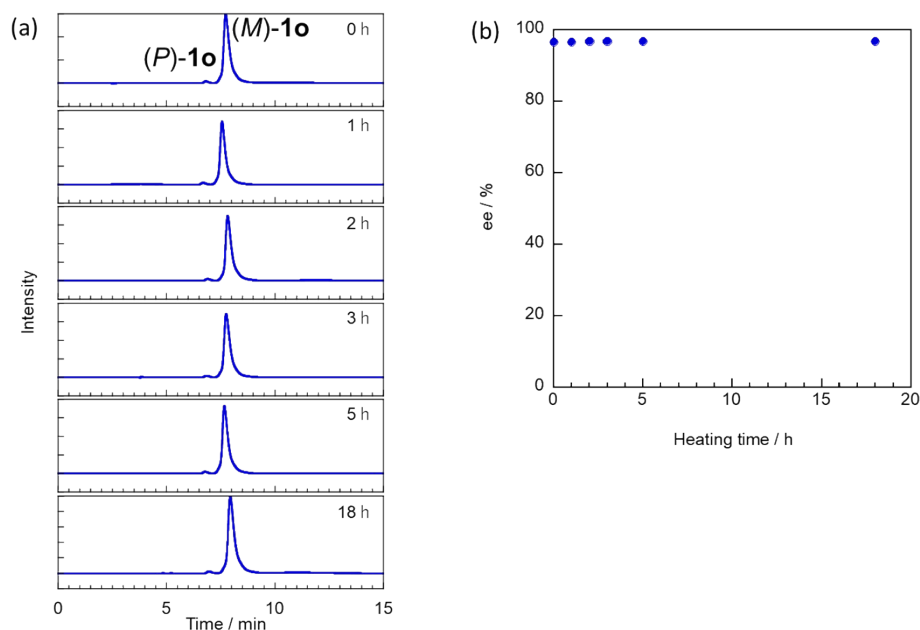

**Fig. S13** (a) Chiral HPLC diagrams of optically resolved (*M*)-**1o** in hexane during heating at 60 °C. (b) Change in enantiomer excess of (*M*)-**1o**. Column: Daicel CHIRALCEL OZ-H 4.6 mm id x 250 mm length, Eluent: Hex, Current: 1.0 mL min<sup>-1</sup>, Detection wavelength 285 nm.

### 3-10 Chiral photoswitch reactions of the other enantiomer

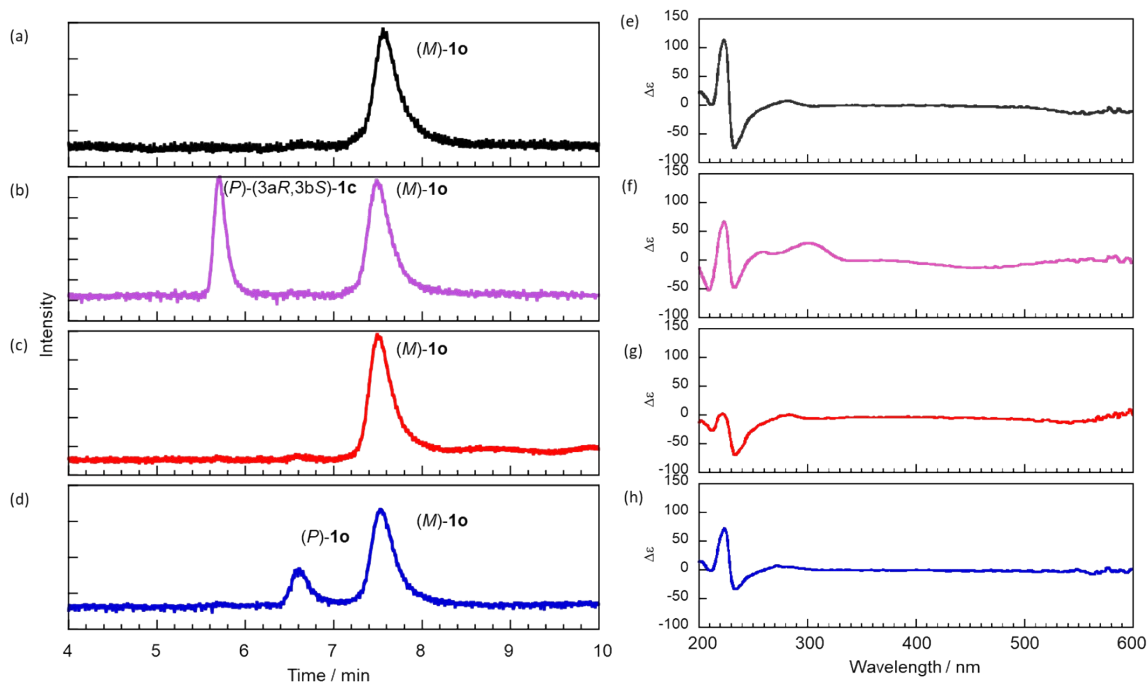

**Fig. S20** Change in chiral HPLC diagrams (a-d) and CD spectra (e-h) of resolved (*M*)-**1o** (hexane: 1.0 mL min<sup>-1</sup>, detected at 299 nm). (a,e) Initial state; (b,f) 280-nm light (0.21 mW cm<sup>-2</sup>) irradiation for 6 min; (c,g) heating at 60 °C for 21 h after (b,f) state; (d,h) 436-nm light (5.30 mW cm<sup>-2</sup>) irradiation for 64 min after (b,f) state.

## 4 Calculated data

### 4-1 Calculated most stable conformation

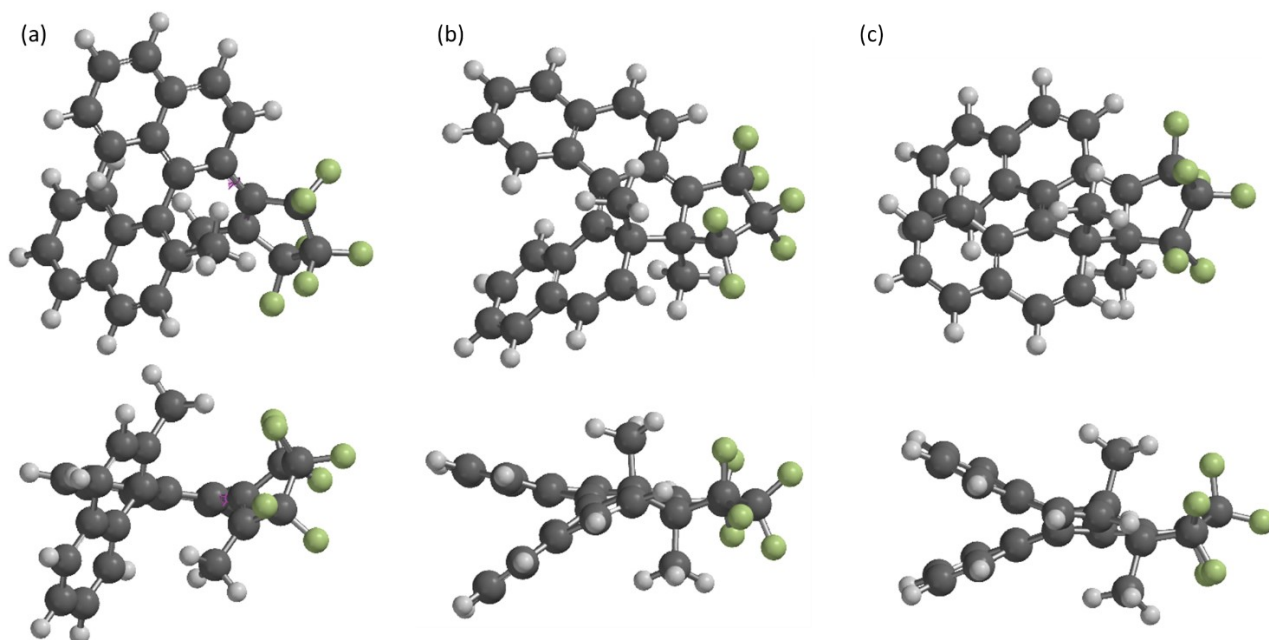

**Fig. S14** The most stable conformation of (a) *(P)*-**1o**, (b) *(P)*-**(3aS,3bR)-1c**, and (c) *(M)*-**(3aS,3bR)-1c**.

### 4-2 Calculated total energy

**Table S1** Total energy of *(P)*-**1o**, *(P)*-**(3aS,3bR)-1c**, and *(M)*-**(3aS,3bR)-1c**

|                                                         | <i>(P)</i> - <b>1o</b> | <i>(P)</i> - <b>(3aS,3bR)-1c</b> | <i>(M)</i> - <b>(3aS,3bR)-1c</b> |
|---------------------------------------------------------|------------------------|----------------------------------|----------------------------------|
| $E$ [kJ/mol]                                            | -4301352.70            | -4301197.38                      | -4301230.34                      |
| $\Delta E$ to <i>(P)</i> - <b>(3aS,3bR)-1c</b> [kJ/mol] | -155.32                | -                                | -32.96                           |

### 4-3 Calculated CD spectra

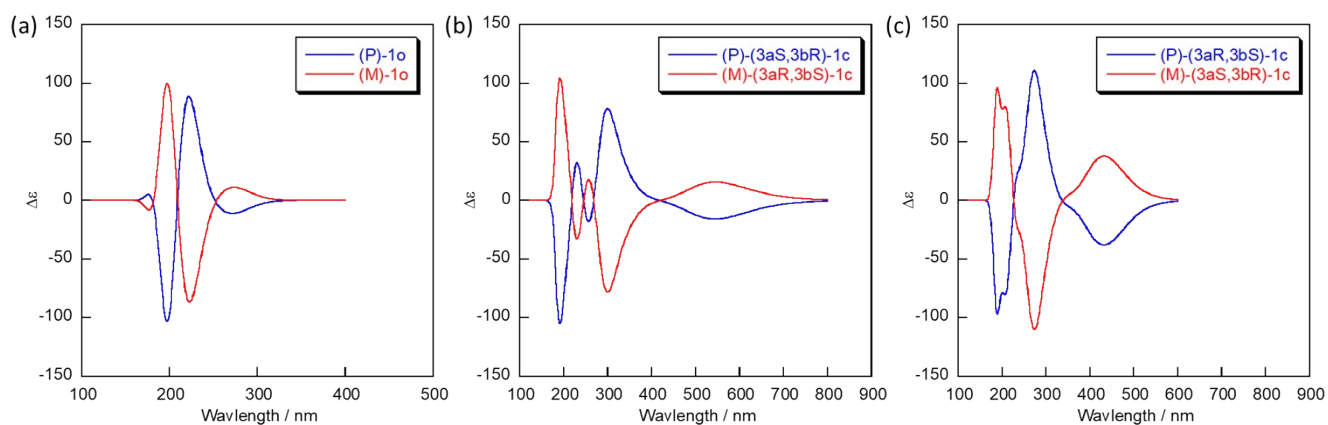

**Fig. S15** Calculated CD spectra of (a) *(P)*-**1o**, *(M)*-**1o**, (b) *(P)*-**(3aS,3bR)-1c**, *(M)*-**(3aR,3bS)-1c** and (c) *(P)*-**(3aR,3bS)-1c**, *(M)*-**(3aS,3bR)-1c**

1c.

#### 4-4 Schematic illustration of cycloreversion

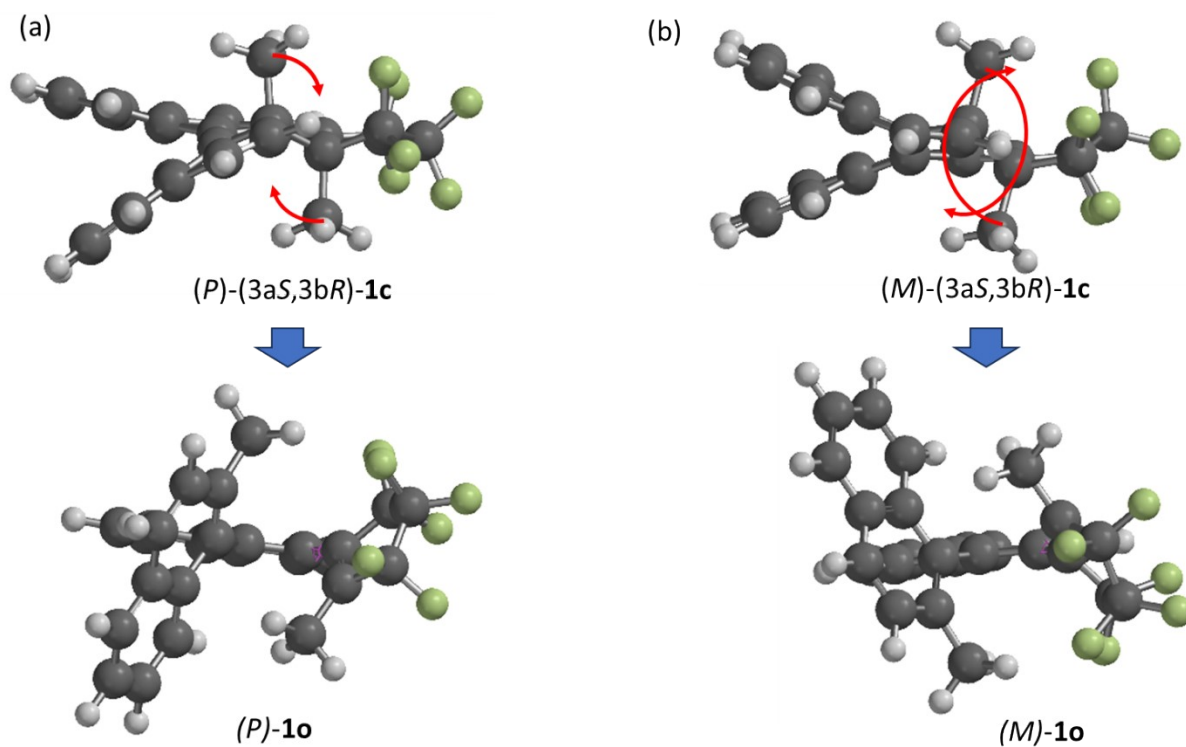

Fig. S16 Schematic illustration of cycloreversion (a) from  $(P)$ -(3a*S*,3b*R*)-**1c** to  $(P)$ -**1o** and (b) from  $(M)$ -(3a*S*,3b*R*)-**1c** to  $(M)$ -**1o**.

#### 4-5 Energy diagram of **1**

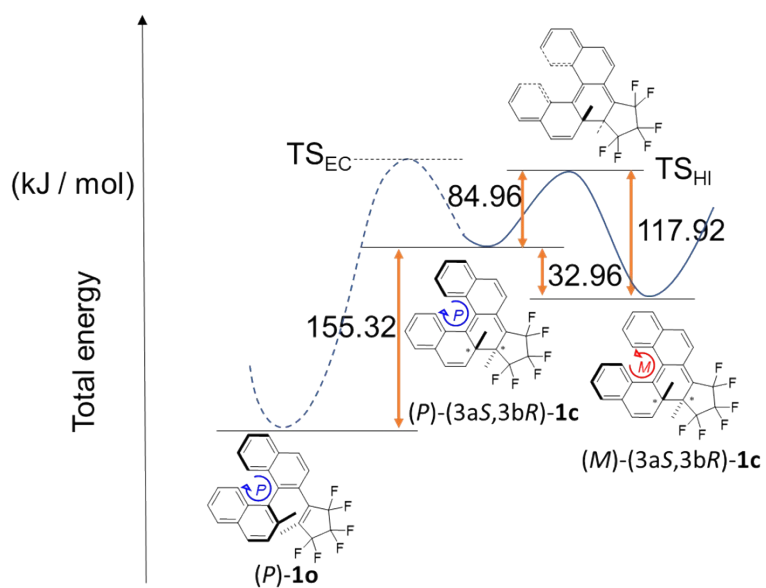

Fig. S17 Energy diagram of 1.

4-6 Transition state

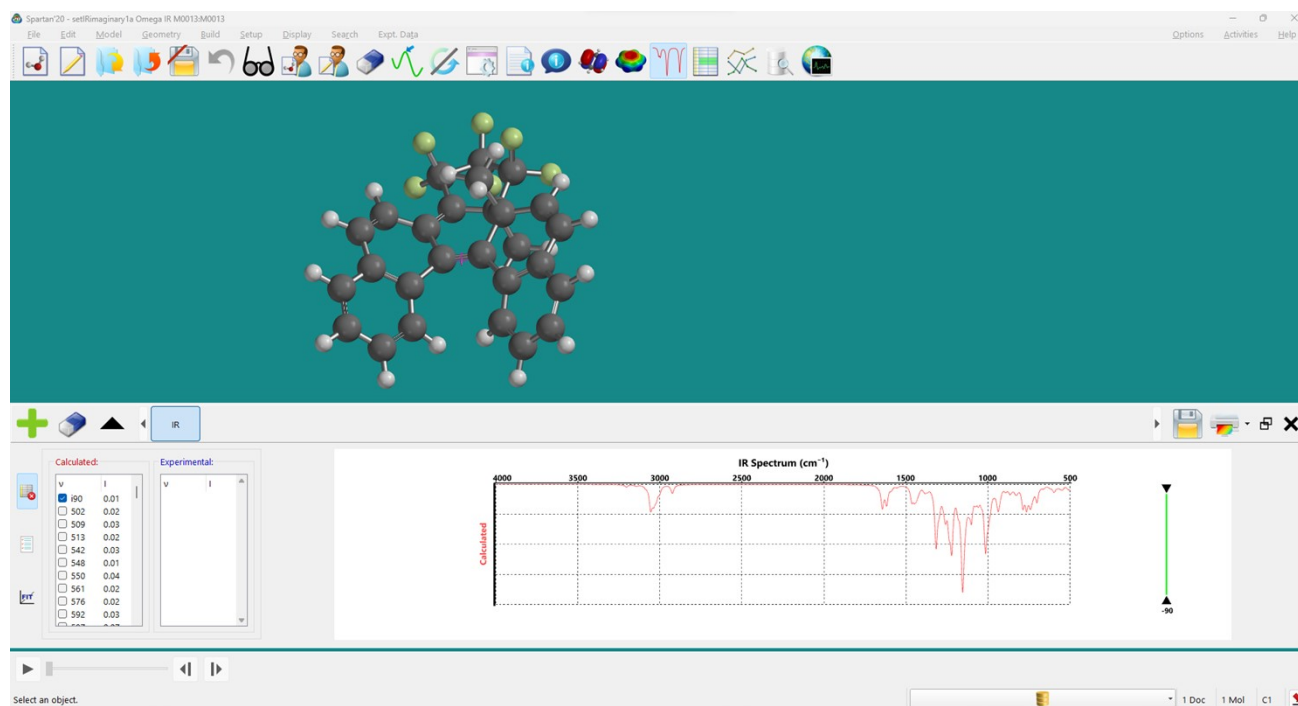

Fig. S18 Transition state structure between (*M*)-(3*aS*,3*bR*)-1*c* and (*P*)-(3*aS*,3*bR*)-1*c*.

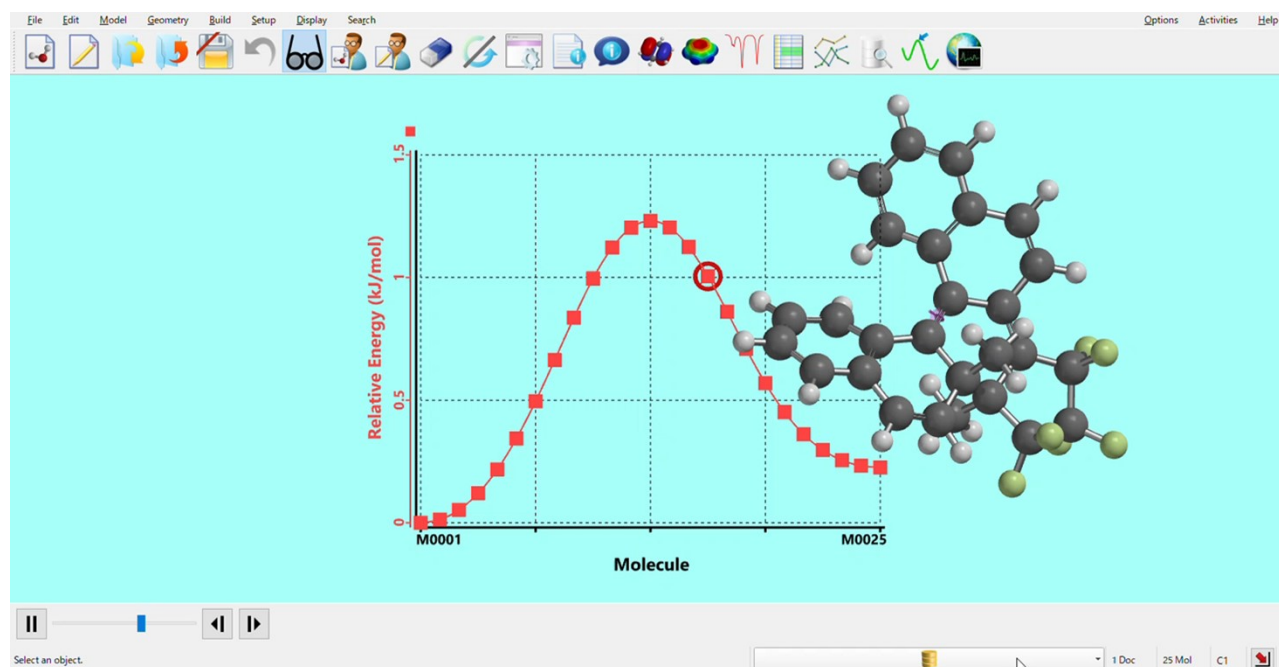

Fig. S19 Intrinsic Reaction Coordinate analysis of 1*c*.

## 4-7 Cartesian coordinates for optimized geometries

*(P)*-1o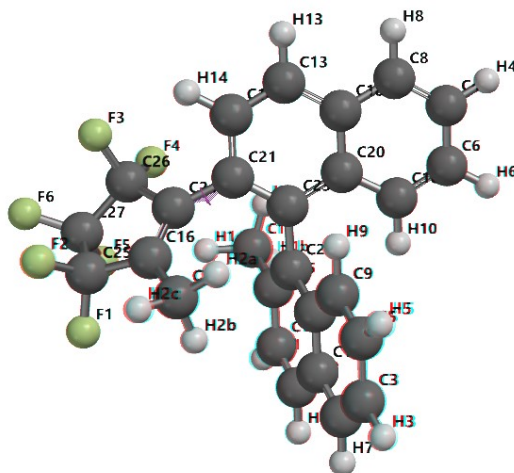

## Standard Nuclear Orientation (Angstroms)

| I  | Atom | X             | Y             | Z             |
|----|------|---------------|---------------|---------------|
| 1  | H    | -2.2385706438 | -0.7953153240 | 0.7979655638  |
| 2  | C    | -1.9996186995 | -0.1125967277 | 1.6066935066  |
| 3  | C    | -1.4109225132 | 1.6262881333  | 3.7085072830  |
| 4  | C    | -2.7260408866 | -0.1576275260 | 2.7687480529  |
| 5  | C    | -0.9327721021 | 0.8132256992  | 1.4423752343  |
| 6  | C    | -0.6427896292 | 1.6964995748  | 2.5173828149  |
| 7  | C    | -2.4304575712 | 0.7200685173  | 3.8361979539  |
| 8  | H    | -1.1727701359 | 2.3080033415  | 4.5210662872  |
| 9  | H    | -3.5356300435 | -0.8741524983 | 2.8704750658  |
| 10 | H    | -3.0123854795 | 0.6742420572  | 4.7515976239  |
| 11 | C    | 0.4169263697  | 2.6278707950  | 2.3725345714  |
| 12 | C    | 1.1325363092  | 2.6859862086  | 1.2113062094  |
| 13 | C    | 0.8594681365  | 1.8167079989  | 0.1214731073  |
| 14 | C    | -0.1405571724 | 0.8713787092  | 0.2465632488  |
| 15 | H    | 0.6441508451  | 3.3007295538  | 3.1953152646  |
| 16 | H    | 1.9324429068  | 3.4139524620  | 1.1030570035  |
| 17 | C    | -0.4395484966 | -0.0843903913 | -0.8651556156 |
| 18 | C    | -1.0706698487 | -1.8654761410 | -2.9644269864 |
| 19 | C    | 0.3914502839  | -1.1537725940 | -1.1616213139 |
| 20 | C    | -1.6126649184 | 0.1335973026  | -1.6622138612 |
| 21 | C    | -1.9354420052 | -0.7715942148 | -2.7100816351 |

|    |   |               |               |               |
|----|---|---------------|---------------|---------------|
| 22 | C | 0.0633549284  | -2.0394248796 | -2.2265466176 |
| 23 | H | -1.3149553561 | -2.5575592580 | -3.7656052540 |
| 24 | H | 0.7322671360  | -2.8648695832 | -2.4430440400 |
| 25 | C | -3.1024018445 | -0.5536346656 | -3.4867567367 |
| 26 | C | -3.9136927198 | 0.5236141182  | -3.2462605592 |
| 27 | C | -3.5877241177 | 1.4360028431  | -2.2175024238 |
| 28 | C | -2.4694461426 | 1.2478431785  | -1.4476238252 |
| 29 | H | -3.3371330416 | -1.2569145201 | -4.2814532788 |
| 30 | H | -4.8037631752 | 0.6831123746  | -3.8471729974 |
| 31 | H | -4.2280107250 | 2.2940269272  | -2.0372305496 |
| 32 | H | -2.2275674881 | 1.9563366452  | -0.6634477648 |
| 33 | C | 1.6785535377  | -1.3854373007 | -0.4673580291 |
| 34 | C | 2.9449092347  | -1.5076637853 | -1.2815051676 |
| 35 | C | 4.0789131846  | -1.3127131969 | -0.2512811585 |
| 36 | C | 3.4162978721  | -1.7298661417 | 1.0790285003  |
| 37 | C | 1.9404920745  | -1.5732604257 | 0.8354102804  |
| 38 | C | 1.6880826280  | 1.9732396807  | -1.1266369121 |
| 39 | H | 1.2273265562  | 1.4981245746  | -1.9943809395 |
| 40 | H | 1.8333831198  | 3.0347323558  | -1.3520351085 |
| 41 | H | 2.6791801001  | 1.5300667182  | -0.9927090012 |
| 42 | C | 1.0125923785  | -1.6966527549 | 1.9929668948  |
| 43 | H | -0.0135828288 | -1.8643392451 | 1.6654519844  |
| 44 | H | 1.0326364199  | -0.7894657346 | 2.6055519011  |
| 45 | H | 1.3277880310  | -2.5342881161 | 2.6239301804  |
| 46 | F | 3.0618374883  | -2.7507859421 | -1.8310557591 |
| 47 | F | 3.0303817720  | -0.6239677116 | -2.2971905558 |
| 48 | F | 4.4140060521  | -0.0053069008 | -0.1970043111 |
| 49 | F | 5.1758329469  | -2.0247883968 | -0.5398816774 |
| 50 | F | 3.8446635461  | -0.9645861551 | 2.1087585086  |
| 51 | F | 3.7393794561  | -3.0152423433 | 1.3738291264  |

-----



(P)-(3aS,3bR)-1c

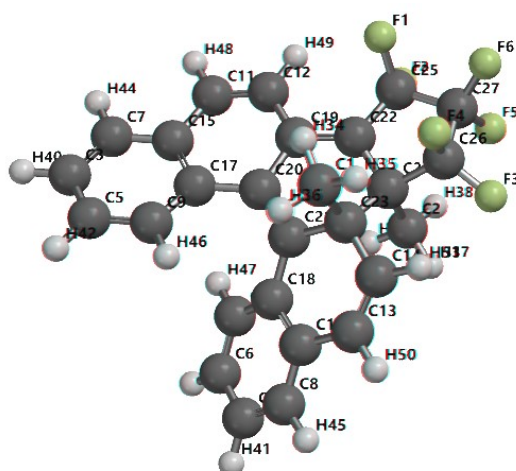

Standard Nuclear Orientation (Angstroms)

| I  | Atom | X             | Y             | Z             |
|----|------|---------------|---------------|---------------|
| 1  | C    | 2.0927889904  | 1.4133733028  | -0.0719878626 |
| 2  | C    | -1.8111603596 | 2.1049331116  | -0.0683456036 |
| 3  | C    | 1.1239526042  | -4.9003651271 | 1.0369579189  |
| 4  | C    | -0.9940266334 | -1.5372216665 | -4.4506258285 |
| 5  | C    | 1.4698257240  | -4.2254976666 | -0.1350984107 |
| 6  | C    | -1.3199409491 | -2.2417833248 | -3.2915474923 |
| 7  | C    | 0.5296712934  | -4.1951809523 | 2.0686758661  |
| 8  | C    | -0.3548273796 | -0.3127962109 | -4.3417929288 |
| 9  | C    | 1.1663420877  | -2.8826945584 | -0.2833120833 |
| 10 | C    | -0.9453441804 | -1.7489749273 | -2.0533593380 |
| 11 | C    | -0.1993583350 | -2.0694986069 | 3.0923719495  |
| 12 | C    | -0.2721588590 | -0.7311332971 | 3.0704227216  |
| 13 | C    | 0.4696612821  | 1.5877294830  | -3.0003605470 |
| 14 | C    | 0.6182372030  | 2.1930335186  | -1.8242527572 |
| 15 | C    | 0.2321458358  | -2.8321531396 | 1.9336965327  |
| 16 | C    | 0.0109257878  | 0.2044976747  | -3.0942011362 |
| 17 | C    | 0.4786170249  | -2.1696283662 | 0.7124351199  |
| 18 | C    | -0.2083001456 | -0.5578156318 | -1.9242210502 |
| 19 | C    | -0.0950113815 | 0.0188001354  | 1.8344102690  |
| 20 | C    | 0.1726646904  | -0.7273195474 | 0.5783712477  |
| 21 | C    | 0.1641276264  | -0.0211543661 | -0.6051085002 |
| 22 | C    | -0.3446885997 | 1.3468788153  | 1.7931372513  |

|    |   |               |               |               |
|----|---|---------------|---------------|---------------|
| 23 | C | 0.5974418115  | 1.4629414818  | -0.5106268752 |
| 24 | C | -0.3649736468 | 2.1238629685  | 0.4975663664  |
| 25 | C | -0.6621092386 | 2.2330935732  | 2.9570969157  |
| 26 | C | -0.0470577828 | 3.5537162008  | 0.9670059006  |
| 27 | C | -0.7032819093 | 3.6797800272  | 2.3707743690  |
| 28 | F | 0.2920693038  | 2.1756771442  | 3.9242590211  |
| 29 | F | -1.8449242005 | 1.9482822735  | 3.5656807682  |
| 30 | F | -0.4979331081 | 4.5123295798  | 0.1266520213  |
| 31 | F | 1.2818404775  | 3.7661933251  | 1.1399719802  |
| 32 | F | -1.9805209295 | 4.0985600340  | 2.2472038370  |
| 33 | F | -0.0493072319 | 4.5542396265  | 3.1474520022  |
| 34 | H | 2.1994358357  | 1.0697427526  | 0.9594353831  |
| 35 | H | 2.5702927416  | 2.3887406559  | -0.1665156809 |
| 36 | H | 2.6169837778  | 0.7121553279  | -0.7273394398 |
| 37 | H | -1.8612242843 | 2.6437475960  | -1.0175497982 |
| 38 | H | -2.5168418152 | 2.5606264350  | 0.6266497902  |
| 39 | H | -2.1195312666 | 1.0707568833  | -0.2376366951 |
| 40 | H | 1.3521730205  | -5.9552333991 | 1.1532936067  |
| 41 | H | -1.2748010055 | -1.9223700636 | -5.4260451631 |
| 42 | H | 1.9903793629  | -4.7467046093 | -0.9327101073 |
| 43 | H | -1.8773301892 | -3.1711975232 | -3.3524348762 |
| 44 | H | 0.3127199353  | -4.6867159750 | 3.0135908809  |
| 45 | H | -0.1574161181 | 0.2795099940  | -5.2313935630 |
| 46 | H | 1.4666731565  | -2.3750914413 | -1.1922753017 |
| 47 | H | -1.2286401741 | -2.2983155542 | -1.1641309266 |
| 48 | H | -0.3862124570 | -2.6106019807 | 4.0162427213  |
| 49 | H | -0.5232905641 | -0.1818063123 | 3.9694368936  |
| 50 | H | 0.5792862000  | 2.1447815788  | -3.9272363646 |
| 51 | H | 0.8519569710  | 3.2532707480  | -1.7726830034 |

-----

(M)-(3a*S*,3b*R*)-1c

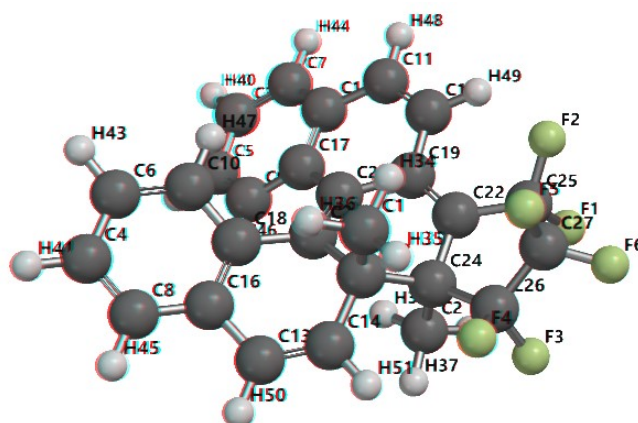

Standard Nuclear Orientation (Angstroms)

| I  | Atom | X             | Y             | Z             |
|----|------|---------------|---------------|---------------|
| 1  | C    | 1.7592916779  | 0.0319048136  | 1.9546070353  |
| 2  | C    | -2.1168785504 | -0.7783121355 | 1.7041722350  |
| 3  | C    | -1.0423808574 | 0.1869822969  | -4.9227818485 |
| 4  | C    | 1.1691774865  | 4.6052924223  | -0.7769265832 |
| 5  | C    | -1.4305016631 | 1.1362850510  | -3.9772214406 |
| 6  | C    | 1.5768205304  | 3.5840915754  | -1.6323224778 |
| 7  | C    | -0.4027866935 | -0.9701238030 | -4.5056813259 |
| 8  | C    | 0.4947549176  | 4.2911204211  | 0.3963690886  |
| 9  | C    | -1.1350076136 | 0.9461754596  | -2.6352052147 |
| 10 | C    | 1.2633641908  | 2.2639572567  | -1.3363809490 |
| 11 | C    | 0.4089770059  | -2.4596477962 | -2.6921576039 |
| 12 | C    | 0.4251729729  | -2.7950741876 | -1.3925128303 |
| 13 | C    | -0.3588796604 | 2.6035984074  | 2.0186017223  |
| 14 | C    | -0.3046116144 | 1.3486400738  | 2.4628681826  |
| 15 | C    | -0.1168605955 | -1.1806184505 | -3.1519258553 |
| 16 | C    | 0.1960561994  | 2.9644856682  | 0.7127991586  |
| 17 | C    | -0.4319240270 | -0.1856552778 | -2.2057645067 |
| 18 | C    | 0.5280415866  | 1.9382075147  | -0.1921369729 |
| 19 | C    | 0.0162775506  | -1.8409392975 | -0.3667042016 |
| 20 | C    | -0.1017420353 | -0.4224668856 | -0.7824108853 |
| 21 | C    | 0.1648468552  | 0.5409178033  | 0.1427738661  |
| 22 | C    | -0.1583182957 | -2.1483047740 | 0.9312552358  |
| 23 | C    | 0.2482602205  | 0.1986714328  | 1.6368059394  |

|    |   |               |               |               |
|----|---|---------------|---------------|---------------|
| 24 | C | -0.6125417040 | -1.0775177060 | 1.9068921889  |
| 25 | C | 0.0449378974  | -3.4537980889 | 1.6240160726  |
| 26 | C | -0.4087981276 | -1.7478850833 | 3.3050437626  |
| 27 | C | 0.4063415619  | -3.0425487507 | 3.0660648693  |
| 28 | F | -1.1075658697 | -4.1846098894 | 1.6686203232  |
| 29 | F | 1.0050175892  | -4.2521788971 | 1.1027882436  |
| 30 | F | -1.5936160983 | -2.1234384726 | 3.8459198379  |
| 31 | F | 0.1980804771  | -0.9657907407 | 4.2310197374  |
| 32 | F | 1.7270952027  | -2.7607388369 | 3.1166542325  |
| 33 | F | 0.1390854463  | -3.9938160872 | 3.9699372261  |
| 34 | H | 2.1792649305  | -0.8084090967 | 1.3948205706  |
| 35 | H | 1.9355734023  | -0.1305564553 | 3.0170930758  |
| 36 | H | 2.2827256385  | 0.9430997070  | 1.6533076879  |
| 37 | H | -2.4977228962 | -0.0973501549 | 2.4692286156  |
| 38 | H | -2.6924940514 | -1.7038384023 | 1.7446621780  |
| 39 | H | -2.2740842360 | -0.3165879801 | 0.7282079324  |
| 40 | H | -1.2650407256 | 0.3383240677  | -5.9745001051 |
| 41 | H | 1.4006020853  | 5.6400781078  | -1.0104547048 |
| 42 | H | -1.9720944194 | 2.0249602355  | -4.2862964123 |
| 43 | H | 2.1428281170  | 3.8144797473  | -2.5294949602 |
| 44 | H | -0.1395464929 | -1.7398784205 | -5.2265947986 |
| 45 | H | 0.2166076585  | 5.0774034917  | 1.0933258907  |
| 46 | H | -1.4515497436 | 1.6856209129  | -1.9079137120 |
| 47 | H | 1.5888110665  | 1.4733502113  | -2.0036073084 |
| 48 | H | 0.7089271016  | -3.1854148647 | -3.4436016625 |
| 49 | H | 0.7232697874  | -3.7880087209 | -1.0816607075 |
| 50 | H | -0.7242134329 | 3.4018144014  | 2.6596094854  |
| 51 | H | -0.6110497528 | 1.1140481764  | 3.4767926737  |

-----

TS of (*M*)-(3*a*S,3*b*R)-**1c** between (*P*)-(3*a*S,3*b*R)-**1c**

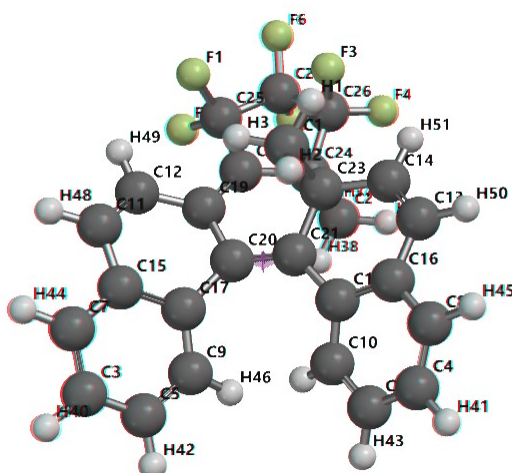

Standard Nuclear Orientation (Angstroms)

| I  | Atom | X             | Y             | Z             |
|----|------|---------------|---------------|---------------|
| 1  | C    | -1.1101182776 | -2.0994476603 | 0.0748419466  |
| 2  | C    | -2.1985266247 | 1.7293399523  | 0.3222314830  |
| 3  | C    | 4.8431709041  | 0.2343585930  | -1.7718988425 |
| 4  | C    | 2.0327339327  | 0.2510326590  | 4.4737211228  |
| 5  | C    | 4.4146853386  | 1.1379879937  | -0.8114085768 |
| 6  | C    | 2.3992691631  | 1.1326328764  | 3.4658946584  |
| 7  | C    | 3.8823586870  | -0.4807398874 | -2.4729241115 |
| 8  | C    | 0.9016105357  | -0.5332120716 | 4.2869735311  |
| 9  | C    | 3.0665189894  | 1.2184969027  | -0.4704567512 |
| 10 | C    | 1.7317418892  | 1.1042565255  | 2.2472189467  |
| 11 | C    | 1.5551576278  | -0.8502463435 | -3.1306722907 |
| 12 | C    | 0.2674386437  | -0.4945074989 | -3.0464460158 |
| 13 | C    | -1.1620058268 | -1.0338682955 | 3.0547430959  |
| 14 | C    | -1.9144701136 | -0.8992978183 | 1.9670101384  |
| 15 | C    | 2.5258693273  | -0.3698713239 | -2.1604122440 |
| 16 | C    | 0.2071225670  | -0.5309130070 | 3.0761895497  |
| 17 | C    | 2.0946175922  | 0.3880607956  | -1.0362160976 |
| 18 | C    | 0.7223197426  | 0.1801513945  | 1.9560206560  |
| 19 | C    | -0.2596854523 | 0.0529327803  | -1.8042623337 |
| 20 | C    | 0.6575821233  | 0.2264769701  | -0.6314806010 |
| 21 | C    | 0.1086861826  | 0.0139602850  | 0.6203771338  |
| 22 | C    | -1.5877410980 | 0.2227728333  | -1.6440329386 |

|    |   |               |               |               |
|----|---|---------------|---------------|---------------|
| 23 | C | -1.3099151762 | -0.6405332408 | 0.6161381573  |
| 24 | C | -2.1861373090 | 0.2949471431  | -0.2551456383 |
| 25 | C | -2.6396131239 | 0.0251415942  | -2.6930985245 |
| 26 | C | -3.6511574845 | -0.1478370107 | -0.4909039588 |
| 27 | C | -3.9744138783 | 0.2667978627  | -1.9470507270 |
| 28 | F | -2.6584417894 | -1.2516189701 | -3.1819912912 |
| 29 | F | -2.5177602643 | 0.8460736729  | -3.7620831463 |
| 30 | F | -3.8180917706 | -1.4943506330 | -0.4241693822 |
| 31 | F | -4.5249220638 | 0.3950271530  | 0.3844854606  |
| 32 | F | -4.2807043647 | 1.5832891277  | -1.9893450279 |
| 33 | F | -4.9984800600 | -0.4230428162 | -2.4649424739 |
| 34 | H | -2.8764737740 | 2.3709335065  | -0.2415826069 |
| 35 | H | -1.1976950404 | 2.1610292118  | 0.2693738459  |
| 36 | H | -2.5182525052 | 1.7176535434  | 1.3679524025  |
| 37 | H | 5.8955204073  | 0.1400011088  | -2.0208171730 |
| 38 | H | 2.5637143045  | 0.2354665849  | 5.4206526439  |
| 39 | H | 5.1221134441  | 1.8009258169  | -0.3224815723 |
| 40 | H | 3.1908594065  | 1.8585842056  | 3.6243615751  |
| 41 | H | 4.1728522717  | -1.1035207045 | -3.3153152909 |
| 42 | H | 0.5052398010  | -1.1198451953 | 5.1118901045  |
| 43 | H | 2.7861701601  | 2.0122106300  | 0.1968054576  |
| 44 | H | 1.9411456346  | 1.8813119563  | 1.5389634726  |
| 45 | H | 1.9285653388  | -1.3766699673 | -4.0050670150 |
| 46 | H | -0.4248652506 | -0.7209446220 | -3.8474951487 |
| 47 | H | -1.5863917482 | -1.3752660064 | 3.9953471882  |
| 48 | H | -2.9719090870 | -1.1467536608 | 1.9833175375  |
| 49 | H | -0.8786603185 | -2.1335049957 | -0.9904546781 |
| 50 | H | -1.9946257963 | -2.7111800439 | 0.2535858347  |
| 51 | H | -0.2760059218 | -2.5446819587 | 0.6240585159  |

---

## 5 References

- 1) (a) Y. Yokoyama, T. Inoue, M. Yokoyama, T. Goto, T. Iwai, N. Kera, I. Hitomi and Y. Kurita, *Bull. Chem. Soc. Jpn.*, 1994, **67**, 3297-3303; (b) Y. Yokoyama and Y. Kurita, *J. Synth. Org. Chem. Jpn.*, 1991, **49**, 364-372.
- 2) J.-D. Chai, M. Head-Gordon, *Phys. Chem. Chem. Phys.*, 2008, **10**, 6615-6620.
- 3) (a) P. C. Hariharanand and J. A. Pople, *Theor. Chim. Acta*, 1973, **28**, 213-222; (b) M. M. Francl, W. J. Pietro, W. J. Hehre, J. S. Binkley, M. S. Godon, D. J. DeFrees and J. A. Pople, *J. Chem. Phys.*, 1982, **77**, 3654-3665.
- 4) Wavefunction, Inc. 18401 Von Karman Ave., Suite 435, Irvine, CA, 2021. Except for molecular mechanics and semi-empirical models, the calculation methods used in Spartan have been documented in: Y. Shao, L. F. Molnar, Y. Jung, J. Kussmann, C. Ochsenfeld, S. T. Brown, A. T. B. Gilbert, L. V. Slipchenko, S. V. Levchenko, D. P. O'Neill, R. A. DiStasio Jr, R. C. Lochan, T. Wang, G. J. O. Beran, N. A. Besley, J. M. Herbert, C. Y. Lin, T. Van Voorhis, S. H. Chien, A. Sodt, R. P. Steele, V. A. Rassolov, P. E. Maslen, P. P. Korambath, R. D. Adamson, B. Austin, J. Baker, E. F. C. Byrd, H. Dachsel, R. J. Doerksen, A. Dreuw, B. D. Dunietz, A. D. Dutoi, T. R. Furlani, S. R. Gwaltney, A. Heyden, S. Hirata, C.-P. Hsu, G. Kedziora, R. Z. Khallilulin, P. Klunzinger, A. M. Lee, M. S. Lee, W.-Z. Liang, I. Lotan, N. Nair, B. Peters, E. I. Proynov, P. A. Pieniazek, Y. M. Rhee, J. Ritchie, E. Rosta, C. D. Sherrill, A. C. Simmonett, J. E. Subotnik, H. L. Woodcock III, W. Zhang, A. T. Bell, A. K. Chakraborty, D. M. Chipman, F. J. Keil, A. Warshel, W. J. Hehre, H. F. Schaefer III, J. Kong, A. I. Krylov, P. M. W. Gill and M. Head-Gordon, *Phys. Chem. Chem. Phys.*, 2006, **8**, 3172-3191.
- 5) (a) T. Clark, J. Chandrasekhar, G. W. Spitznagel and P. v. R. Schleyer, *J. Comp. Chem.*, 1983, **4**, 294-301; (b) M. J. Frisch, J. A. Pople and J. S. Binkley, *J. Chem. Phys.*, 1984, **80**, 3265-3269.
- 6) M. J. Frisch, G. W. Trucks, H. B. Schlegel, G. E. Scuseria, M. A. Robb, J. R. Cheeseman, G. Scalmani, V. Barone, G. A. Petersson, H. Nakatsuji, X. Li, M. Caricato, A. V. Marenich, J. Bloino, B. G. Janesko, R. Gomperts, B. Mennucci, H. P. Hratchian, J. V. Ortiz, A. F. Izmaylov, J. L. Sonnenberg, D. Williams-Young, F. Ding, F. Lipparini, F. Egidi, J. Goings, B. Peng, A. Petrone, T. Henderson, D. Ranasinghe, V. G. Zakrzewski, J. Gao, N. Rega, G. Zheng, W. Liang, M. Hada, M. Ehara, K. Toyota, R. Fukuda, J. Hasegawa, M. Ishida, T. Nakajima, Y. Honda, O. Kitao, H. Nakai, T. Vreven, K. Throssell, J. A. Montgomery, Jr., J. E. Peralta, F. Ogliaro, M. J. Bearpark, J. J. Heyd, E. N. Brothers, K. N. Kudin, V. N. Staroverov, T. A. Keith, R. Kobayashi, J. Normand, K. Raghavachari, A. P. Rendell, J. C. Burant, S. S. Iyengar, J. Tomasi, M. Cossi, J. M. Millam, M. Klene, C. Adamo, R. Cammi, J. W. Ochterski, R. L. Martin, K. Morokuma, O. Farkas, J. B. Foresman and D. J. Fox, Gaussian, Inc., Wallingford CT, **2016**. <https://gaussian.com/citation/>.
- 7) I. A. Shuklov, N. V. Dubrovina, H. Jiao, A. Spannenberg and A. Börner, *Eur. J. Org. Chem.*, **2010**, 1669-1680.
